# Supplementary material for: Preparation of amino-functionalized CoFe2O4@SiO2 magnetic nanocomposites for potential application in absorbing heavy metal ions
Source: Royal Society of Chemistry journal article supplement (doi:10.1039/c6ra13304e), 2016-01-01
Supplement: c6ra13304e1.pdf [file c6ra13304e1.pdf]

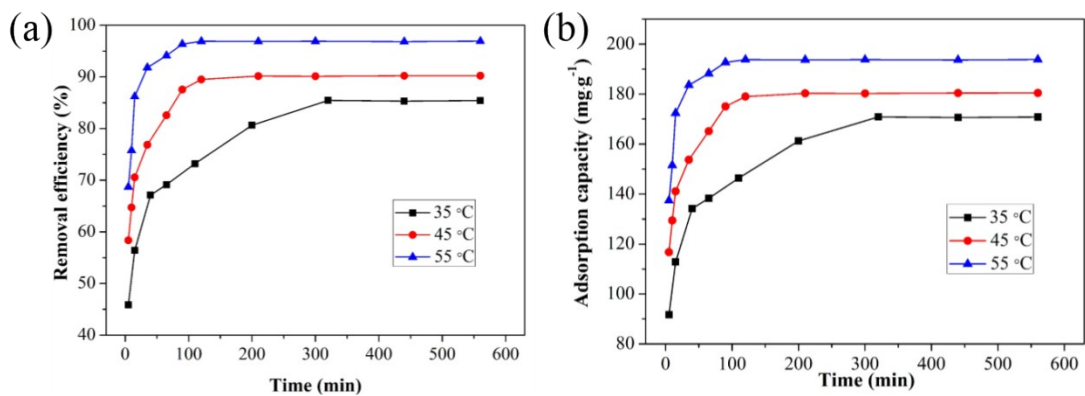

Fig. S1 Effect of temperature on adsorption of Cu (II) by CoFe<sub>2</sub>O<sub>4</sub>@SiO<sub>2</sub>-NH<sub>2</sub>: (a) removal efficiency, and (b) adsorption capacity.
